# Supplementary material for: Preemptive Administration of Albumin during Pancreatectomy Does Not Reduce Postoperative Complications: A Prospective Randomized Controlled Trial
Source: MDPI journal article supplement (doi:10.3390/jcm11030620), 2022-01-26
Supplement: s1 [file s1]

**Table S1.** Risk assessment scoring systems to predict postoperative outcomes after pancreaticoduodenectomy

| Scoring system                | Definition                                                                                                                                                                                                                                        |                                           |        |
|-------------------------------|---------------------------------------------------------------------------------------------------------------------------------------------------------------------------------------------------------------------------------------------------|-------------------------------------------|--------|
| Pancreatic fistula risk score | A simple 10-point fistula risk score, accrued from International Study Group of Pancreatic Fistula risk factors, which accurately predicts the development of clinically relevant postoperative pancreatic fistula after pancreaticoduodenectomy. |                                           |        |
|                               | Risk factor                                                                                                                                                                                                                                       | Parameter                                 | Points |
|                               | Gland texture                                                                                                                                                                                                                                     | Firm                                      | 0      |
|                               |                                                                                                                                                                                                                                                   | Soft                                      | 2      |
|                               | Pathology                                                                                                                                                                                                                                         | Pancreatic adenocarcinoma or pancreatitis | 0      |
|                               |                                                                                                                                                                                                                                                   | Ampullary, duodenal, cystic, islet cell   | 1      |
|                               | Pancreatic duct diameter, mm                                                                                                                                                                                                                      | $\geq 5$                                  | 0      |
|                               |                                                                                                                                                                                                                                                   | 4                                         | 1      |
|                               |                                                                                                                                                                                                                                                   | 3                                         | 2      |
|                               |                                                                                                                                                                                                                                                   | 2                                         | 3      |
|                               |                                                                                                                                                                                                                                                   | $\leq 1$                                  | 4      |
|                               | Intraoperative blood loss, ml                                                                                                                                                                                                                     | $\leq 400$                                | 0      |
|                               |                                                                                                                                                                                                                                                   | 401 - 700                                 | 1      |
|                               |                                                                                                                                                                                                                                                   | 701 - 1000                                | 2      |
|                               |                                                                                                                                                                                                                                                   | $> 1000$                                  | 3      |

---

Braga score                      An 11-point prognostic score to predict postoperative outcome and major complications after pancreaticoduodenectomy.

| Predictor                    | Categories | Scores |
|------------------------------|------------|--------|
| Pancreatic texture           | Hard       | 0      |
|                              | Soft       | 4      |
| Pancreatic duct diameter, mm | > 3        | 0      |
|                              | ≤ 3        | 1      |
| Operative blood loss, ml     | < 700      | 0      |
|                              | ≥ 700      | 4      |
| American Society of          | I          | 0      |
| Anesthesiologist Score       | II         | 1      |
|                              | III        | 2      |

---

**Table S2.** Subgroup analysis of postoperative complications after pancreatectomy

| Claviden-Dindo classification $\geq 2$ | Control<br>group<br>( <i>n</i> = 100) | Albumin<br>group<br>( <i>n</i> = 100) | Risk<br>difference<br>(%)<br>(95% CI) | Effect<br>estimate <sup>1</sup><br>(95% CI) | P<br>value |
|----------------------------------------|---------------------------------------|---------------------------------------|---------------------------------------|---------------------------------------------|------------|
| Subgroup                               |                                       |                                       |                                       |                                             |            |
| Pancreaticoduodenectomy                | 33 (43)                               | 45 (52)                               | 8 (-7 to 24)                          | 1.19 (0.86 to<br>1.65)                      | 0.290      |
| Other surgeries <sup>2</sup>           | 5 (21)                                | 3 (23)                                | -2 (-30 to 26)                        | 1.11 (0.31 to<br>3.91)                      | 0.874      |

CI: confidence interval. <sup>1</sup>Effect estimate is risk ratio (2-sided 95% CI) by Wald likelihood ratio approximation test and Chi-square hypothesis tests. <sup>2</sup>Other surgeries included radical antegrade modular pancreatosplenectomy and total pancreatectomy.
